# Supplementary material
Source: PubMed Central journal article supplement (PMC4872386)
Supplement: CEI-184-378-s001.pdf [file CEI-184-378-s001.pdf]

## Supplementary Tables

**Supplementary Table 1a: Percentage Inhibition of classical pathway activity by C1-INH in combination with heparin, dalteparin, nadroparin or enoxaparin.** The inhibition of C5b-9 deposition was calculated by dividing the OD of the sample with heparinoid by the control, the sample without heparinoid or C1-INH. Data are expressed in the mean and SEM of n = 3 experiments.

| Heparinoids         | C1-Inhibitor: |              |              |              |              |              |
|---------------------|---------------|--------------|--------------|--------------|--------------|--------------|
|                     | 0 U/mL        | 0.375 U/mL   | 0.75 U/mL    | 1.5 U/mL     | 3 U/mL       | 6 U/mL       |
| 0 UI/mL             | 0%            | 69.4% ± 2.5% | 79.3% ± 2.0% | 86.2% ± 1.6% | 91.6% ± 1.2% | 96.3% ± 0.4% |
| <b>Heparin:</b>     |               |              |              |              |              |              |
| 0.0625 UI/mL        | 54.1% ± 3.7%  | 77.5% ± 1.8% | 85.2% ± 1.1% | 88.9% ± 0.6% | 91.5% ± 0.5% | 91.5% ± 3.9% |
| 0.125 UI/mL         | 31.9% ± 5.2%  | 81.0% ± 1.4% | 87.2% ± 0.9% | 91.9% ± 0.6% | 94.8% ± 0.4% | 97.9% ± 0.2% |
| 0.25 UI/mL          | 44.8% ± 5.2%  | 83.2% ± 1.5% | 86.5% ± 1.3% | 92.5% ± 0.6% | 96.4% ± 0.3% | 98.2% ± 0.1% |
| 0.5 UI/mL           | 64.1% ± 2.5%  | 90.0% ± 1.0% | 94.0% ± 1.0% | 96.8% ± 0.5% | 98.3% ± 0.3% | 99.6% ± 0.1% |
| 1.0 UI/mL           | 60.4% ± 3.0%  | 93.1% ± 0.6% | 96.2% ± 0.3% | 98.2% ± 0.2% | 99.0% ± 0.2% | 99.2% ± 0.1% |
| <b>Dalteparin :</b> |               |              |              |              |              |              |
| 0.0625 UI/mL        | 28.6% ± 6.0%  | 80.4% ± 2.1% | 86.6% ± 1.5% | 91.7% ± 0.8% | 95.5% ± 0.3% | 97.8% ± 0.1% |
| 0.125 UI/mL         | 40.7% ± 4.7%  | 83.3% ± 1.4% | 86.1% ± 0.9% | 92.6% ± 0.9% | 95.9% ± 0.5% | 98.6% ± 0.1% |
| 0.25 UI/mL          | 46.0% ± 4.2%  | 88.2% ± 1.0% | 93.4% ± 0.8% | 96.4% ± 0.3% | 98.3% ± 0.3% | 99.5% ± 0.1% |
| 0.5 UI/mL           | 60.0% ± 2.8%  | 92.3% ± 0.8% | 95.5% ± 0.3% | 97.7% ± 0.2% | 99.1% ± 0.1% | 99.2% ± 0.2% |
| 1.0 UI/mL           | 42.2% ± 1.9%  | 92.2% ± 0.2% | 95.2% ± 0.1% | 97.1% ± 0.1% | 99.2% ± 0.1% | 99.4% ± 0.5% |
| <b>Nadroparin:</b>  |               |              |              |              |              |              |
| 0.0625 UI/mL        | 10.9% ± 6.2%  | 75.4% ± 2.2% | 85.7% ± 1.4% | 89.8% ± 1.1% | 94.2% ± 0.7% | 97.6% ± 0.4% |
| 0.125 UI/mL         | 23.5% ± 4.6%  | 76.7% ± 1.3% | 82.7% ± 1.0% | 88.4% ± 0.8% | 94.1% ± 0.4% | 96.9% ± 0.4% |
| 0.25 UI/mL          | 15.9% ± 6.3%  | 79.4% ± 2.9% | 85.6% ± 2.0% | 89.0% ± 2.4% | 95.2% ± 0.4% | 98.1% ± 0.2% |
| 0.5 UI/mL           | 43.8% ± 5.3%  | 86.4% ± 1.9% | 89.3% ± 1.2% | 94.0% ± 0.6% | 96.7% ± 0.6% | 98.8% ± 0.2% |
| 1.0 UI/mL           | 42.5% ± 5.3%  | 90.2% ± 0.8% | 94.9% ± 0.6% | 97.2% ± 0.4% | 99.0% ± 0.2% | 99.6% ± 0.1% |
| <b>Enoxaparin:</b>  |               |              |              |              |              |              |
| 0.0625 UI/mL        | 21.0% ± 5.2%  | 68.1% ± 2.5% | 73.4% ± 2.0% | 83.5% ± 1.6% | 91.0% ± 1.2% | 95.7% ± 0.4% |
| 0.125 UI/mL         | 20.6% ± 4.1%  | 77.5% ± 2.4% | 85.1% ± 1.2% | 90.7% ± 1.0% | 94.6% ± 0.8% | 97.0% ± 0.3% |
| 0.25 UI/mL          | 21.6% ± 3.8%  | 80.0% ± 1.2% | 86.1% ± 1.0% | 90.6% ± 0.6% | 96.0% ± 0.2% | 97.1% ± 0.2% |
| 0.5 UI/mL           | 21.5% ± 4.8%  | 80.5% ± 1.7% | 84.2% ± 1.1% | 91.1% ± 0.5% | 96.2% ± 0.3% | 98.6% ± 0.2% |
| 1.0 UI/mL           | 41.2% ± 4.0%  | 87.8% ± 0.9% | 92.0% ± 0.5% | 96.1% ± 0.3% | 98.7% ± 0.2% | 99.5% ± 0.1% |

F. Poppelaars

**Supplementary Table 1b: Percentage Inhibition of lectin pathway activity by C1-INH in combination with heparin, dalteparin, nadroparin or enoxaparin.** The inhibition of C5b-9 deposition was calculated by dividing the OD of the sample with heparinoid by the control, the sample without heparinoid or C1-INH. Data are expressed in the mean and SEM of n = 3 experiments.

| <b>Heparinoids</b>  | <b>C1-Inhibitor:</b> |                   |                  |                  |                  |                  |
|---------------------|----------------------|-------------------|------------------|------------------|------------------|------------------|
|                     | <i>0 U/mL</i>        | <i>0.375 U/mL</i> | <i>0.75 U/mL</i> | <i>1.5 U/mL</i>  | <i>3 U/mL</i>    | <i>6 U/mL</i>    |
| <i>0 UI/mL</i>      | 0%                   | 95.5% ±<br>0.1%   | 99.1% ±<br>0.1%  | 99.5% ±<br>0.1%  | 99.7% ±<br>0.2%  | 99.9% ±<br>0.1%  |
| <b>Heparin:</b>     |                      |                   |                  |                  |                  |                  |
| <i>0.0625 UI/mL</i> | 44.4% ±<br>1.4%      | 97.1% ±<br>0.1%   | 98.9% ±<br>0.0%  | 99.6% ±<br>0.1%  | 100.0% ±<br>0.1% | 99.8% ±<br>0.1%  |
| <i>0.125 UI/mL</i>  | 62.8% ±<br>0.3%      | 97.7% ±<br>0.1%   | 99.2% ±<br>0.1%  | 99.3% ±<br>0.1%  | 99.8% ±<br>0.1%  | 100.0% ±<br>0.1% |
| <i>0.25 UI/mL</i>   | 81.7% ±<br>0.2%      | 97.5% ±<br>0.2%   | 98.7% ±<br>0.3%  | 99.6% ±<br>0.1%  | 99.2% ±<br>0.1%  | 99.4% ±<br>0.1%  |
| <i>0.5 UI/mL</i>    | 90.1% ±<br>0.2%      | 100.0% ±<br>0.0%  | 100.0% ±<br>0.0% | 100.0% ±<br>0.0% | 100.0% ±<br>0.1% | 100.0% ±<br>0.0% |
| <i>1.0 UI/mL</i>    | 85.6% ±<br>0.9%      | 100.0% ±<br>0.0%  | 100.0% ±<br>0.1% | 100.0% ±<br>0.0% | 100.0% ±<br>0.1% | 100.0% ±<br>0.0% |
| <b>Dalteparin :</b> |                      |                   |                  |                  |                  |                  |
| <i>0.0625 UI/mL</i> | 61.9% ±<br>0.6%      | 98.8% ±<br>0.1%   | 99.8% ±<br>0.0%  | 100.0% ±<br>0.0% | 99.8% ±<br>0.0%  | 100.0% ±<br>0.0% |
| <i>0.125 UI/mL</i>  | 76.8% ±<br>1.9%      | 98.3% ±<br>0.1%   | 99.6% ±<br>0.1%  | 100.0% ±<br>0.0% | 100.0% ±<br>0.0% | 100.0% ±<br>0.0% |
| <i>0.25 UI/mL</i>   | 79.4% ±<br>0.7%      | 100.0% ±<br>0.0%  | 100.0% ±<br>0.1% | 100.0% ±<br>0.1% | 100.0% ±<br>0.1% | 100.0% ±<br>0.1% |
| <i>0.5 UI/mL</i>    | 89.2% ±<br>0.5%      | 99.9% ±<br>0.0%   | 100.0% ±<br>0.0% | 100.0% ±<br>0.0% | 100.0% ±<br>0.2% | 100.0% ±<br>0.1% |
| <i>1.0 UI/mL</i>    | 91.3% ±<br>0.4%      | 99.9% ±<br>0.0%   | 100.0% ±<br>0.1% | 100.0% ±<br>0.0% | 100.0% ±<br>0.1% | 100.0% ±<br>0.0% |
| <b>Nadroparin:</b>  |                      |                   |                  |                  |                  |                  |
| <i>0.0625 UI/mL</i> | 38.6% ±<br>1.3%      | 97.5% ±<br>0.0%   | 99.4% ±<br>0.0%  | 100.0% ±<br>0.0% | 100.0% ±<br>0.0% | 100.0% ±<br>0.0% |
| <i>0.125 UI/mL</i>  | 61.0% ±<br>0.3%      | 97.3% ±<br>0.0%   | 99.3% ±<br>0.1%  | 99.9% ±<br>0.0%  | 100.0% ±<br>0.0% | 99.8% ±<br>0.0%  |
| <i>0.25 UI/mL</i>   | 69.7% ±<br>0.8%      | 98.9% ±<br>0.0%   | 99.9% ±<br>0.0%  | 100.0% ±<br>0.0% | 99.8% ±<br>0.0%  | 100.0% ±<br>0.0% |
| <i>0.5 UI/mL</i>    | 84.4% ±<br>0.9%      | 99.6% ±<br>0.0%   | 99.7% ±<br>0.0%  | 100.0% ±<br>0.0% | 100.0% ±<br>0.0% | 100.0% ±<br>0.0% |
| <i>1.0 UI/mL</i>    | 87.6% ±<br>0.3%      | 100.0% ±<br>0.0%  | 100.0% ±<br>0.0% | 100.0% ±<br>0.0% | 99.9% ±<br>0.1%  | 100.0% ±<br>0.0% |
| <b>Enoxaparin:</b>  |                      |                   |                  |                  |                  |                  |
| <i>0.0625 UI/mL</i> | 39.8% ±<br>1.3%      | 95.5% ±<br>0.3%   | 99.3% ±<br>0.0%  | 100.0% ±<br>0.0% | 100.0% ±<br>0.1% | 100.0% ±<br>0.1% |
| <i>0.125 UI/mL</i>  | 52.4% ±<br>1.7%      | 98.2% ±<br>0.0%   | 99.8% ±<br>0.0%  | 99.8% ±<br>0.1%  | 100.0% ±<br>0.0% | 100.0% ±<br>0.0% |
| <i>0.25 UI/mL</i>   | 66.4% ±<br>0.2%      | 98.9% ±<br>0.1%   | 99.8% ±<br>0.0%  | 100.0% ±<br>0.0% | 100.0% ±<br>0.0% | 100.0% ±<br>0.0% |
| <i>0.5 UI/mL</i>    | 77.2% ±<br>0.3%      | 99.4% ±<br>0.0%   | 100.0% ±<br>0.0% | 100.0% ±<br>0.0% | 100.0% ±<br>0.0% | 100.0% ±<br>0.0% |
| <i>1.0 UI/mL</i>    | 89.2% ±<br>0.3%      | 99.6% ±<br>0.0%   | 99.8% ±<br>0.0%  | 100.0% ±<br>0.0% | 100.0% ±<br>0.0% | 100.0% ±<br>0.0% |

**Supplementary Table 1c: Percentage Inhibition of alternative pathway activity by C1-INH in combination with heparin, dalteparin, nadroparin or enoxaparin.** The inhibition of C5b-9 deposition was calculated by dividing the OD of the sample with heparinoid by the control, the sample without heparinoid or C1-INH. Data are expressed in the mean and SEM of n = 3 experiments.

| <b>Heparinoids</b>  | <b>C1-Inhibitor:</b> |                   |                  |                 |                 |                 |
|---------------------|----------------------|-------------------|------------------|-----------------|-----------------|-----------------|
|                     | <i>0 U/mL</i>        | <i>0.375 U/mL</i> | <i>0.75 U/mL</i> | <i>1.5 U/mL</i> | <i>3 U/mL</i>   | <i>6 U/mL</i>   |
| <i>0 UI/mL</i>      | 0%                   | 37.6% ±<br>3.3%   | 57.8% ±<br>2.4%  | 60.0% ±<br>2.7% | 65.0% ±<br>2.6% | 85.2% ±<br>1.0% |
| <b>Heparin:</b>     |                      |                   |                  |                 |                 |                 |
| <i>0.0625 UI/mL</i> | 0.8% ±<br>4.4%       | 14.0% ±<br>2.5%   | 19.8% ±<br>1.6%  | 16.8% ±<br>1.8% | 26.8% ±<br>1.9% | 50.1% ±<br>3.0% |
| <i>0.125 UI/mL</i>  | 24.6% ±<br>5.7%      | 40.2% ±<br>1.8%   | 40.5% ±<br>4.1%  | 27.3% ±<br>0.4% | 31.0% ±<br>1.7% | 78.9% ±<br>0.1% |
| <i>0.25 UI/mL</i>   | 61.0% ±<br>1.7%      | 47.4% ±<br>1.8%   | 0.0% ±<br>3.5%   | 34.2% ±<br>2.3% | 65.0% ±<br>0.5% | 85.6% ±<br>1.0% |
| <i>0.5 UI/mL</i>    | 53.1% ±<br>4.4%      | 74.1% ±<br>3.1%   | 88.5% ±<br>0.8%  | 91.8% ±<br>0.9% | 93.8% ±<br>0.5% | 96.7% ±<br>0.4% |
| <i>1.0 UI/mL</i>    | 68.4% ±<br>1.7%      | 77.8% ±<br>1.4%   | 78.6% ±<br>0.9%  | 80.3% ±<br>0.7% | 77.9% ±<br>0.2% | 75.9% ±<br>0.3% |
| <b>Dalteparin :</b> |                      |                   |                  |                 |                 |                 |
| <i>0.0625 UI/mL</i> | 22.2% ±<br>1.7%      | 37.4% ±<br>2.4%   | 40.7% ±<br>3.9%  | 39.5% ±<br>4.1% | 56.3% ±<br>1.6% | 87.5% ±<br>0.7% |
| <i>0.125 UI/mL</i>  | 82.4% ±<br>2.3%      | 77.1% ±<br>1.1%   | 0.8% ±<br>2.4%   | 36.4% ±<br>0.7% | 67.6% ±<br>0.6% | 88.1% ±<br>0.2% |
| <i>0.25 UI/mL</i>   | 23.1% ±<br>0.8%      | 28.8% ±<br>1.8%   | 29.8% ±<br>1.7%  | 31.4% ±<br>0.9% | 32.0% ±<br>0.5% | 32.8% ±<br>0.2% |
| <i>0.5 UI/mL</i>    | 84.2% ±<br>1.2%      | 88.3% ±<br>1.1%   | 91.1% ±<br>0.7%  | 90.9% ±<br>0.4% | 92.0% ±<br>0.5% | 92.7% ±<br>0.3% |
| <i>1.0 UI/mL</i>    | 72.6% ±<br>1.1%      | 73.5% ±<br>1.3%   | 61.8% ±<br>1.2%  | 51.8% ±<br>2.5% | 90.6% ±<br>0.3% | 98.0% ±<br>0.2% |
| <b>Nadroparin:</b>  |                      |                   |                  |                 |                 |                 |
| <i>0.0625 UI/mL</i> | 43.3% ±<br>1.0%      | 73.9% ±<br>1.2%   | 83.8% ±<br>0.8%  | 90.7% ±<br>0.6% | 92.9% ±<br>0.5% | 97.0% ±<br>0.2% |
| <i>0.125 UI/mL</i>  | 59.5% ±<br>4.2%      | 74.4% ±<br>2.4%   | 61.5% ±<br>1.1%  | 68.7% ±<br>1.8% | 80.0% ±<br>0.8% | 75.3% ±<br>0.7% |
| <i>0.25 UI/mL</i>   | 40.7% ±<br>0.2%      | 51.5% ±<br>1.8%   | 49.8% ±<br>0.9%  | 32.7% ±<br>3.1% | 55.8% ±<br>2.9% | 89.0% ±<br>1.0% |
| <i>0.5 UI/mL</i>    | 82.6% ±<br>1.2%      | 65.9% ±<br>2.1%   | 8.3% ±<br>2.1%   | 44.9% ±<br>1.1% | 65.3% ±<br>0.9% | 86.7% ±<br>0.6% |
| <i>1.0 UI/mL</i>    | 62.8% ±<br>0.7%      | 84.0% ±<br>1.2%   | 91.5% ±<br>1.0%  | 94.8% ±<br>0.6% | 96.8% ±<br>0.3% | 98.0% ±<br>0.2% |
| <b>Enoxaparin:</b>  |                      |                   |                  |                 |                 |                 |
| <i>0.0625 UI/mL</i> | 38.0% ±<br>1.6%      | 21.5% ±<br>3.5%   | 32.9% ±<br>1.9%  | 54.8% ±<br>0.9% | 67.3% ±<br>1.1% | 81.7% ±<br>0.4% |
| <i>0.125 UI/mL</i>  | 44.3% ±<br>2.4%      | 70.5% ±<br>2.7%   | 80.9% ±<br>1.9%  | 83.6% ±<br>1.3% | 90.7% ±<br>0.6% | 94.2% ±<br>0.4% |
| <i>0.25 UI/mL</i>   | 22.1% ±<br>7.0%      | 49.6% ±<br>4.2%   | 44.2% ±<br>6.2%  | 55.7% ±<br>4.9% | 54.9% ±<br>4.1% | 67.2% ±<br>2.1% |
| <i>0.5 UI/mL</i>    | 42.5% ±<br>1.8%      | 35.2% ±<br>4.5%   | 38.0% ±<br>1.8%  | 22.5% ±<br>3.2% | 42.5% ±<br>4.2% | 85.3% ±<br>1.1% |
| <i>1.0 UI/mL</i>    | 88.1% ±<br>0.6%      | 73.7% ±<br>0.9%   | 43.3% ±<br>2.7%  | 62.0% ±<br>1.8% | 75.8% ±<br>1.1% | 91.7% ±<br>0.4% |
